# Supplementary material for: Exosome-derived lnc-HOXB8-1:2 induces tumor-associated macrophage infiltration to promote neuroendocrine differentiated colorectal cancer progression by sponging hsa-miR-6825-5p
Source: PubMed Central journal article supplement (PMC9419355; doi:10.1186/s12885-022-09926-1), 2022-08-27

# Full-length gels and blots

Figure 2C

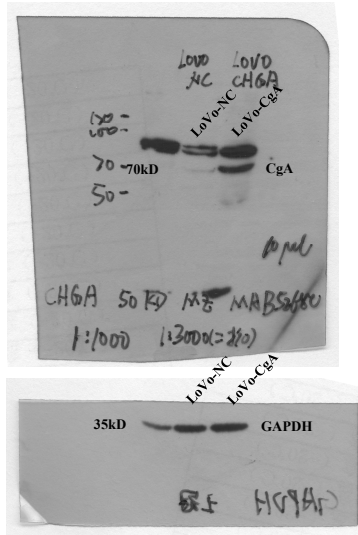

Figure 2F

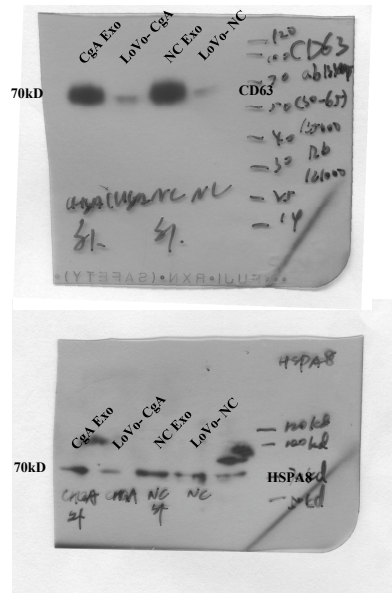

Figure 3E

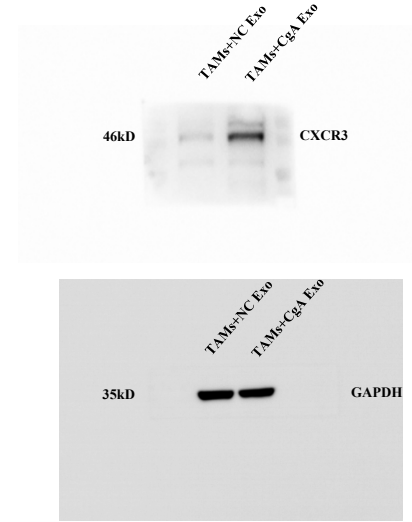

Figure 6I

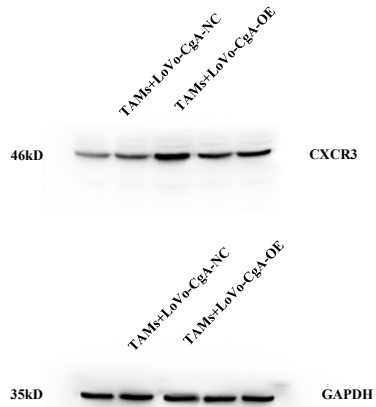

Figure 6K

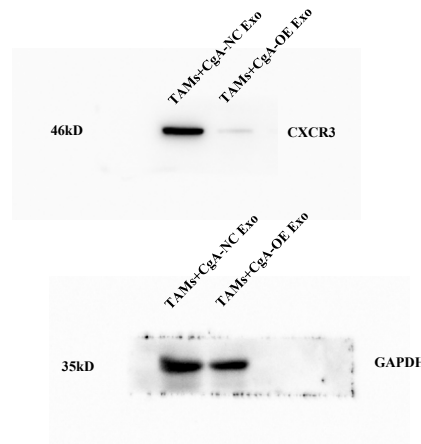

Figure 6M

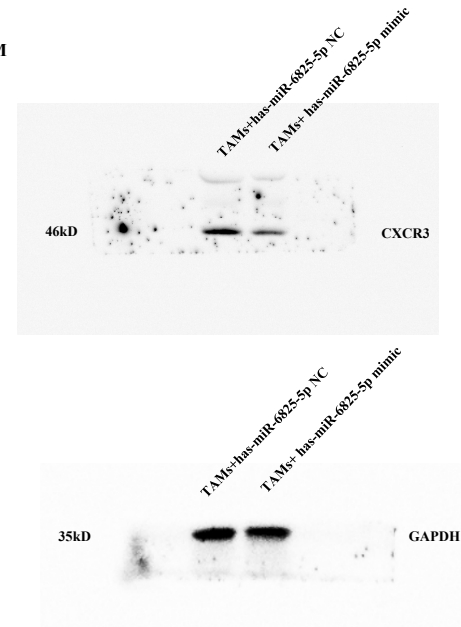

Supplement: 12885_2022_9926_MOESM5_ESM.pdf [file 12885_2022_9926_MOESM5_ESM.pdf]
